# Supplementary material for: Manual dexterity of mice during food-handling involves the thumb and a set of fast basic movements
Source: PubMed Central journal article supplement (PMC6961851; doi:10.1371/journal.pone.0226774), 2020-01-15
Supplement: pone.0226774.s002.pdf [file pone.0226774.s002.pdf]

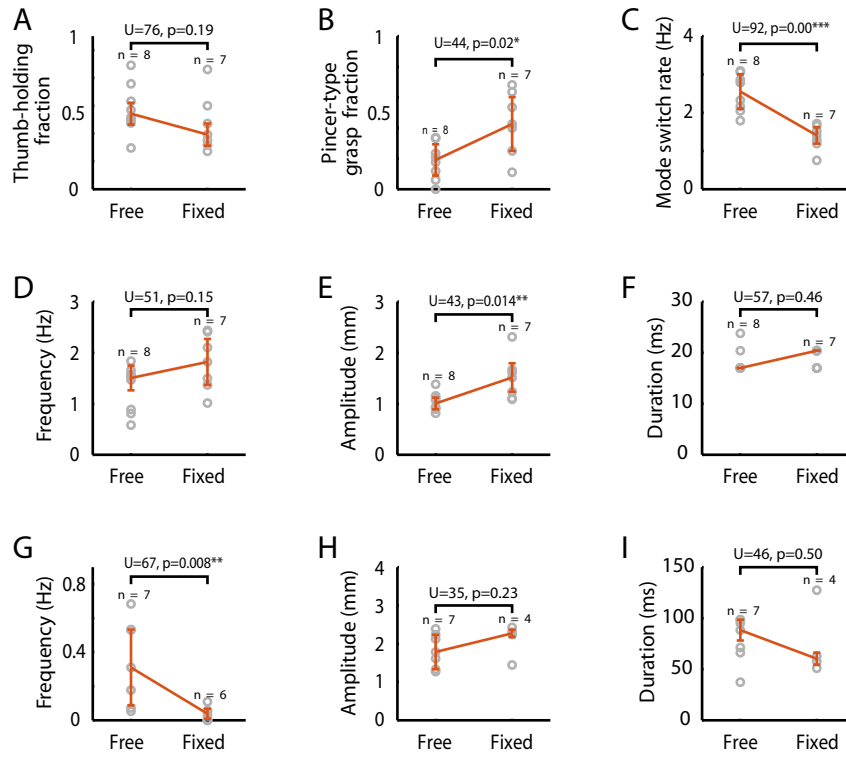

Suppl. Fig. S2
